# Supplementary material for: Modern Dressings in Prevention and Therapy of Acute and Chronic Radiation Dermatitis—A Literature Review
Source: MDPI journal article supplement (doi:10.3390/pharmaceutics14061204), 2022-06-06
Supplement: s1 [file s1]

**Table S1.** Proposed T.I.M.E. wound bed preparation for acute and chronic radiation dermatitis

| Type of radiation dermatitis | T.I.M.E. domain                        | Actions                                                                                                                                                                                                                                                                                                                                                                                                       |
|------------------------------|----------------------------------------|---------------------------------------------------------------------------------------------------------------------------------------------------------------------------------------------------------------------------------------------------------------------------------------------------------------------------------------------------------------------------------------------------------------|
| Acute                        | T – tissue management                  | Debridement during radiotherapy is rarely performed in the clinical practice due to the possible impact on oncological treatment (dose distribution, a risk of seeding of cancer cells).                                                                                                                                                                                                                      |
|                              | I – inflammation and infection control | Moderate and severe acute radiation dermatitis may be related to secondary infections due to the immunosuppression, skin damage and concomitant systemic treatment. In the case of mild infections topical therapies with silver-coated dressings or topical antimicrobials should be considered. Skin infections with general symptoms (severe edema, fever, pain) are the indications for oral antibiotics. |
|                              | M – moisture balance                   | The important part of the prevention and treatment of acute radiation dermatitis is the moisture balance. Severe acute radiation dermatitis is related to moist desquamation. Thus, appropriate hydration and protection of the skin using paraffin-coated dressing or radiotherapy-dedicated creams is recommended. In the case of severe exudate, film and hydrocolloid dressings should be avoided.        |
|                              | E - epithelial edge advancement        | It is important to eliminate or reduce extrinsic factors that may impair the reepithelization such as too tight clothes, repeated trauma, or the use of other irritating factors (such as chlorine water, antiperspirants).                                                                                                                                                                                   |
| Chronic                      | T – tissue management                  | Appropriate types of debridement (surgical, enzymatic) in the case of necrosis should be considered after the exclusion of cancer recurrence (local regrowth may mimic chronic radiation dermatitis) or secondary cancer.                                                                                                                                                                                     |
|                              | I – inflammation and infection control | Rules are similar to those in other infected wounds.                                                                                                                                                                                                                                                                                                                                                          |
|                              | M – moisture balance                   | Wounds related to chronic radiation dermatitis are rarely exudative. Atrophic changes require intensive moisturizing (creams for atopic dermatitis).                                                                                                                                                                                                                                                          |
|                              | E - epithelial edge advancement        | Hyperbaric oxygen therapy may be used in selected patients to improve healing. A special attention should be paid on the possibility of ischemia with chronic hypoxia after high-dose radiotherapy that causes irreversible endothelial damage.                                                                                                                                                               |

**Table S2.** Dressings for prevention and treatment of acute radiation dermatitis

| <b>Dressing classification</b> | <b>Dressing type</b> | <b>Study</b>             | <b>Study type</b> | <b>Sample size</b> | <b>Cancer type</b> | <b>Aim</b>      | <b>Clinical outcome</b>                                                                                                   | <b>Confirmed efficacy (met endpoint)</b> |
|--------------------------------|----------------------|--------------------------|-------------------|--------------------|--------------------|-----------------|---------------------------------------------------------------------------------------------------------------------------|------------------------------------------|
| Film or membrane               | Mepitel film         | Herst et al., 2014 [1]   | RCT               | 78                 | breast             | ARD prophylaxis | complete prevention of moist desquamation, 92% reduction of skin reaction severity                                        | yes                                      |
|                                |                      | Rades et al., 2019 [2]   | RCT               | 28                 | head and neck      | ARD prophylaxis | not superior to standard care, prematurely stopped (tolerance)                                                            | no                                       |
|                                |                      | Wooding et al., 2018 [3] | RCT               | 36                 | head and neck      | ARD prophylaxis | reduced risk of developing ARD                                                                                            | yes                                      |
|                                |                      | Yee et al., 2020 [4]     | single arm CT     | 30                 | breast, chest wall | ARD prophylaxis | prevention of grade 3 ARD, reduction of grade 2 ARD cases, feasibility confirmed                                          | yes                                      |
|                                |                      | Møller et al., 2018 [5]  | RCT               | 101                | breast             | ARD prophylaxis | reduction of patient-reported symptoms, lower severity of ARD, no difference in the blinded-staff evaluation at follow-up | yes (primary endpoint)                   |
|                                |                      | Yan et al., 2020 [6]     | RCT               | 39                 | head and neck      | ARD prophylaxis | reduces severity of ARD including moist desquamation compared to Biafine cream                                            | yes                                      |

|  |                             |                          |                            |     |               |                 |                                                                                 |     |
|--|-----------------------------|--------------------------|----------------------------|-----|---------------|-----------------|---------------------------------------------------------------------------------|-----|
|  |                             | Oshin et al., 2020 [7]   | retrospective review       | 15  | chest wall    | ARD prophylaxis | reduction of moist desquamation incidence and severity                          | yes |
|  | Soft silicone film dressing | Zou et al., 2021 [8]     | RCT                        | 100 | various       | ARD prophylaxis | lower incidence of ARD in experimental arm                                      | yes |
|  | StrataXRT®                  | Chan et al., 2019 [9]    | RCT                        | 197 | head and neck | ARD prophylaxis | reduced risk of developing grade 2 and 3 skin toxicity                          | yes |
|  |                             | Ahn et al., 2020 [10]    | RCT                        | 56  | breast        | ARD prophylaxis | reduced objectively measured ARD severity                                       | yes |
|  |                             | Quilis et al., 2018 [11] | multicenter prospective CT | 54  | various       | ARD treatment   | significant improvement in RISRAS score, reduction of patient-reported symptoms | yes |

|  |                               |                           |                       |    |               |                 |                                                                                                                                                                                                |       |
|--|-------------------------------|---------------------------|-----------------------|----|---------------|-----------------|------------------------------------------------------------------------------------------------------------------------------------------------------------------------------------------------|-------|
|  |                               | Chao et al., 2019 [12]    | noninferiority RCT    | 44 | breast        | ARD prophylaxis | StrataXRT not inferior to Mepitel Film                                                                                                                                                         | yes   |
|  | Polymeric membrane dressing   | Scott, 2014 [13]          | RCT                   | 20 | head and neck | ARD treatment   | reduced self-reported pain, improved quality of life, no effect on healing rates                                                                                                               | mixed |
|  |                               | Hegarty et al., 2014 [14] | single arm CT         | 23 | head and neck | ARD treatment   | superior to standard care                                                                                                                                                                      | yes   |
|  | Hydrofilm (polyurethane film) | Schmeel et al., 2018 [15] | RCT                   | 62 | breast        | ARD prophylaxis | ARD severity reduction, preventing of moist desquamation                                                                                                                                       | yes   |
|  |                               | Schmeel et al., 2019 [16] | self-controlled trial | 74 | breast        | ARD prophylaxis | reduction of physician-assessed ARD, decreased erythema and hyperpigmentation, prevention of moist desquamation, reduction of itching, burning, pain, and limitations of day-to-day-activities | yes   |

|        |                         |                                  |                       |     |                                  |                 |                                                                                                                                                                                                                                            |                                      |
|--------|-------------------------|----------------------------------|-----------------------|-----|----------------------------------|-----------------|--------------------------------------------------------------------------------------------------------------------------------------------------------------------------------------------------------------------------------------------|--------------------------------------|
| Silver | Silver nylon dressings  | Aquino-Parsons et al., 2010 [17] | RCT                   | 196 | breast                           | ARD prophylaxis | no decrease in the incidence of moist desquamation, decrease in itching                                                                                                                                                                    | no (only secondary endpoint was met) |
|        |                         | Vuong et al., 2004 [18]          | single arm CT         | 30  | gynaecological, anal             | ARD prophylaxis | effective in reducing RID severity (compared to historical controls)                                                                                                                                                                       | yes                                  |
|        |                         | Vavassis et al., 2008 [19]       | self-controlled trial | 12  | head and neck                    | ARD treatment   | not superior to standard care                                                                                                                                                                                                              | no                                   |
|        |                         | Niazi et al., 2012 [20]          | RCT                   | 42  | anal and rectal cancer           | ARD prophylaxis | effective in reducing RID severity on the last day of treatment but not 2 weeks post-treatment                                                                                                                                             | yes                                  |
| Foam   | Mepilex Lite            | Diggelmann et al., 2010 [21]     | self-controlled trial | 24  | breast                           | ARD treatment   | reduction of radiation-induced erythema                                                                                                                                                                                                    | yes                                  |
|        |                         | Zhong et al., 2013 [22]          | self-controlled trial | 88  | head and neck                    | ARD treatment   | acceleration of ARD healing                                                                                                                                                                                                                | yes                                  |
|        |                         | Paterson et al., 2012 [23]       | self-controlled trial | 74  | breast                           | ARD treatment   | decreases the severity of all skin reactions                                                                                                                                                                                               | yes                                  |
| Gel    | Hydrogel                | Gollins et al., 2008 [24]        | RCT                   | 30  | head and neck, breast            | ARD treatment   | hydrogel dressings superior to gentian violet in increasing healing of moist desquamation                                                                                                                                                  | yes                                  |
|        |                         | Macmillan et al., 2007 [25]      | RCT                   | 100 | head and neck, breast, anorectal | ARD treatment   | prolonged healing times in hydrogel group                                                                                                                                                                                                  | no                                   |
|        |                         | Bazire et al., 2015 [26]         | RCT                   | 186 | breast                           | ARD treatment   | no difference between Hydrosorb and control groups                                                                                                                                                                                         | no                                   |
|        | 3M Cavilon Barrier Film | Lam et al., 2019 [27]            | RCT                   | 55  | breast                           | ARD prophylaxis | no significant reduction of ARD during or post-treatment (paired analysis), significant reduction of ARD in lateral compartment (unpaired analysis) during treatment but not post-treatment, reduction of pruritus and burning sensations. | no                                   |

|             |                                |                                 |                               |     |                  |                                             |                                                                                             |     |
|-------------|--------------------------------|---------------------------------|-------------------------------|-----|------------------|---------------------------------------------|---------------------------------------------------------------------------------------------|-----|
|             |                                | Graham et al., 2004 [28]        | RCT                           | 61  | breast           | ARD prophylaxis                             | reduction (vs sorbolene cream) of moist desquamation rates and pruritus                     | yes |
|             |                                | Shaw et al., 2015 [29]          | RCT                           | 39  | breast           | ARD prophylaxis                             | no significant differences in pain, pruritus and ARD severity after application of the film | no  |
| Biodressing | GM-CSF-impregnated gauze       | Kouvaris et al., 2001 [30]      | retrospective cohort analysis | 61  | vulvar carcinoma | ARD prophylaxis and treatment               | effective in preventing and healing radiation-induced dermatitis                            | yes |
|             | Foam dressing with EGF         | Lee et al., 2016 [31]           | single arm CT                 | 7   | head and neck    | ARD treatment                               | acceleration of healing of severe ARD on the supraclavicular fossa or neck areas            | yes |
|             | Irradiated, lyophilised amnion | Lobo Gajiwala et al., 2003 [32] | single-arm CT                 | 14  | cervix, rectum   | ARD treatment                               | shorter duration of healing (moist desquamation/ulcers)                                     | yes |
| Other       | Airwall                        | Arimura et al., 2016 [33]       | non-randomized CT             | 271 | prostate         | ARD prophylaxis (proton therapy)            | ARD severity reduction                                                                      | yes |
|             | Calcium alginate               | Bonomo et al., 2019 [34]        | retrospective cohort analysis | 51  | head and neck    | ARD treatment (radiotherapy with cetuximab) | improval of treatment tolerability                                                          | yes |
|             | Nonadherent absorbent dressing | Mak et al., 2005 [35]           | RCT                           | 146 | head and neck    | ARD treatment                               | no difference between dressing and gentian violet groups in reduction of moist desquamation | no  |

Abbreviations: ARD - acure radiation dermatitis, CT - clinical trial, EGF - epidermal growth factor, GM-CSF - granulocyte-macrophage colony-stimulating factor, RCT - randomized clinical trial, RISRAS - Radiation-induced Skin Reaction Assessment Scale

## References

1. Herst PM, Bennett NC, Sutherland AE, Peszynski RI, Paterson DB, Jasperse ML. Prophylactic use of Mepitel Film prevents radiation-induced moist desquamation in an intra-patient randomised controlled clinical trial of 78 breast cancer patients. *Radiother Oncol.* 2014;110(1):137-143. doi:10.1016/j.radonc.2014.01.005
2. Rades D, Narvaez CA, Splettstößer L, et al. A randomized trial (RAREST-01) comparing Mepitel® Film and standard care for prevention of radiation dermatitis in patients irradiated for locally advanced squamous cell carcinoma of the head-and-neck (SCCHN). *Radiother Oncol.* 2019;139:79-82. doi:10.1016/j.radonc.2019.07.023
3. Wooding H, Yan J, Yuan L, et al. The effect of Mepitel Film on acute radiation-induced skin reactions in head and neck cancer patients: a feasibility study. *Br J Radiol.* 2018;91(1081):20170298. doi:10.1259/bjr.20170298
4. Yee C, Lam E, Gallant F, et al. A Feasibility Study of Mepitel Film for the Prevention of Breast Radiation Dermatitis in a Canadian Center. *Pract Radiat Oncol.* 2021;11(1):e36-e45. doi:10.1016/j.prro.2020.09.004
5. Møller PK, Olling K, Berg M, et al. Breast cancer patients report reduced sensitivity and pain using a barrier film during radiotherapy – A Danish intra-patient randomized multicentre study. *Tech Innov Patient Support Radiat Oncol.* 2018;7:20-25. doi:10.1016/j.tipsro.2018.05.004
6. Yan J, Yuan L, Wang J, et al. Mepitel Film is superior to Biafine cream in managing acute radiation-induced skin reactions in head and neck cancer patients: a randomised intra-patient controlled clinical trial. *J Med Radiat Sci.* 2020;67(3):208-216. doi:10.1002/jmrs.397
7. Oshin F, McBrayne L, Bratt M, et al. A Retrospective Chart Review on the Prophylactic Use of Mepitel Film for Breast Cancer Patients undergoing Chest Wall Irradiation: A Single-institution Experience. *J Med Imaging Radiat Sci.* 2020;51(3):S3-S4. doi:10.1016/j.jmir.2020.07.014
8. Zou MY, Xu DJ, Zhang R, et al. Study on Prevention of Acute Radiodermatitis with Soft Silicone Film Dressing. *Indian J Pharm Sci.* 2021;83. doi:10.36468/pharmaceutical-sciences.spl.250
9. Chan RJ, Blades R, Jones L, et al. A single-blind, randomised controlled trial of StrataXRT® – A silicone-based film-forming gel dressing for prophylaxis and management of radiation dermatitis in patients with head and neck cancer. *Radiother Oncol.* 2019;139:72-78. doi:10.1016/j.radonc.2019.07.014
10. Ahn S, Sung K, Kim HJ, et al. Reducing Radiation Dermatitis Using a Film-forming Silicone Gel During Breast Radiotherapy: A Pilot Randomized-controlled Trial. *In Vivo.* 2020;34(1):413-422. doi:10.21873/invivo.11790
11. Quilis A, Martín J, Rodríguez C, Sánchez P, Ribes JL. Reducing radiation dermatitis during ongoing radiation therapy: an innovative film-forming wound dressing. *J Radiat Oncol.* 2018;7(3):255-264. doi:10.1007/s13566-018-0356-5
12. Chao MWT, Spencer S, Kai C, et al. EP-1286 StrataXRT is non inferior to Mepitel Film in preventing radiation induced moist desquamation. *Radiother Oncol.* 2019;133:S704-S705. doi:10.1016/S0167-8140(19)31706-2
13. Scott A. Polymeric membrane dressings for radiotherapy-induced skin damage. *Br J Nurs.* 2014;23(Sup10):S24-S31. doi:10.12968/bjon.2014.23.Sup10.S24
14. Hegarty F, Wong M. Polymeric membrane dressing for radiotherapy-induced skin reactions. *Br J Nurs.* 2014;23(Sup20):S38-S46. doi:10.12968/bjon.2014.23.Sup20.S38
15. Schmeel LC, Koch D, Stumpf S, et al. Prophylactically applied Hydrofilm polyurethane film dressings reduce radiation dermatitis in adjuvant radiation therapy of breast cancer patients. *Acta Oncol.* 2018;57(7):908-915. doi:10.1080/0284186X.2018.1441542
16. Schmeel LC, Koch D, Schmeel FC, et al. Hydrofilm Polyurethane Films Reduce Radiation Dermatitis Severity in Hypofractionated Whole-Breast

- Irradiation: An Objective, Intra-Patient Randomized Dual-Center Assessment. *Polymers*. 2019;11(12):E2112. doi:10.3390/polym11122112
17. Aquino-Parsons C, Lomas S, Smith K, et al. Phase III Study of Silver Leaf Nylon Dressing vs Standard Care for Reduction of Inframammary Moist Desquamation in Patients Undergoing Adjuvant Whole Breast Radiation Therapy. *J Med Imaging Radiat Sci*. 2010;41(4):215-221. doi:10.1016/j.jmir.2010.08.005
  18. Vuong T, Franco E, Lehnert S, et al. Silver leaf nylon dressing to prevent radiation dermatitis in patients undergoing chemotherapy and external beam radiotherapy to the perineum. *Int J Radiat Oncol*. 2004;59(3):809-814. doi:10.1016/j.ijrobp.2003.11.031
  19. Vavassis P, Gelinas M, Chabot Tr J, Nguyen-Tân PF. Phase 2 study of silver leaf dressing for treatment of radiation-induced dermatitis in patients receiving radiotherapy to the head and neck. *J Otolaryngol - Head Neck Surg J Oto-Rhino-Laryngol Chir Cervico-Faciale*. 2008;37(1):124-129.
  20. Niazi TM, Vuong T, Azoulay L, et al. Silver Clear Nylon Dressing is Effective in Preventing Radiation-Induced Dermatitis in Patients With Lower Gastrointestinal Cancer: Results From a Phase III Study. *Int J Radiat Oncol*. 2012;84(3):e305-e310. doi:10.1016/j.ijrobp.2012.03.062
  21. Diggelmann KV, Zytkevich AE, Tuaine JM, Bennett NC, Kelly LE, Herst PM. Mepilex Lite dressings for the management of radiation-induced erythema: a systematic inpatient controlled clinical trial. *Br J Radiol*. 2010;83(995):971-978. doi:10.1259/bjr/62011713
  22. Zhong WH, Tang QF, Hu LY, Feng HX. Mepilex Lite dressings for managing acute radiation dermatitis in nasopharyngeal carcinoma patients: a systematic controlled clinical trial. *Med Oncol*. 2013;30(4):761. doi:10.1007/s12032-013-0761-y
  23. Paterson D. Randomized Intra-patient Controlled Trial of Mepilex Lite Dressings versus Aqueous Cream in Managing Radiation-Induced Skin Reactions Postmastectomy. *J Cancer Sci Ther*. 2012;04(11). doi:10.4172/1948-5956.1000166
  24. Gollins S, Gaffney C, Slade S, Swindell R. RCT on gentian violet versus a hydrogel dressing for radiotherapy-induced moist skin desquamation. *J Wound Care*. 2008;17(6):268-275. doi:10.12968/jowc.2008.17.6.29589
  25. Macmillan MS, Wells M, MacBride S, Raab GM, Munro A, MacDougall H. Randomized Comparison of Dry Dressings Versus Hydrogel in Management of Radiation-Induced Moist Desquamation. *Int J Radiat Oncol*. 2007;68(3):864-872. doi:10.1016/j.ijrobp.2006.12.049
  26. Bazire L, Fromantin I, Diallo A, et al. Hydrosorb® versus control (water based spray) in the management of radio-induced skin toxicity: Results of multicentre controlled randomized trial. *Radiother Oncol*. 2015;117(2):229-233. doi:10.1016/j.radonc.2015.08.028
  27. Lam AC, Yu E, Vanwynsberghe D, et al. Phase III Randomized Pair Comparison of a Barrier Film vs. Standard Skin Care in Preventing Radiation Dermatitis in Post-lumpectomy Patients with Breast Cancer Receiving Adjuvant Radiation Therapy. *Cureus*. Published online June 3, 2019. doi:10.7759/cureus.4807
  28. Graham P, Browne L, Capp A, et al. Randomized, paired comparison of No-Sting Barrier Film versus sorbolene cream (10% glycerine) skin care during postmastectomy irradiation. *Int J Radiat Oncol*. 2004;58(1):241-246. doi:10.1016/S0360-3016(03)01431-7
  29. Shaw SZ, Nien HH, Wu CJ, Lui LT, Su JF, Lang CH. 3M Cavilon No-Sting Barrier Film or topical corticosteroid (mometasone furoate) for protection against radiation dermatitis: A clinical trial. *J Formos Med Assoc*. 2015;114(5):407-414. doi:10.1016/j.jfma.2013.04.003
  30. Kouvaris JR, Kouloulis VE, Plataniotis GA, Balafouta EJ, Vlahos LJ. Dermatitis during radiation for vulvar carcinoma: prevention and treatment with granulocyte-macrophage colony-stimulating factor impregnated gauze. *Wound Repair Regen*. 2001;9(3):187-193. doi:10.1046/j.1524-475x.2001.00187.x
  31. Lee J, Lee S wook, Hong JP, Shon MW, Ryu SH, Ahn SD. Foam dressing with epidermal growth factor for severe radiation dermatitis in head and neck cancer patients: Foam dressing with EGF for radiation dermatitis. *Int Wound J*. 2016;13(3):390-393. doi:10.1111/iwj.12317
  32. Lobo Gajiwala A, Sharma V. Use of Irradiated Amnion as a Biological Dressing in the Treatment of Radiation Induced Ulcers. *Cell Tissue Bank*.



2003;4(2-4):147-150. doi:10.1023/B:CATB.0000007024.81019.03

33. Arimura T, Ogino T, Yoshiura T, et al. Effect of Film Dressing on Acute Radiation Dermatitis Secondary to Proton Beam Therapy. *Int J Radiat Oncol.* 2016;95(1):472-476. doi:10.1016/j.ijrobp.2015.10.053
34. Bonomo P, Desideri I, Loi M, et al. Management of severe bio-radiation dermatitis induced by radiotherapy and cetuximab in patients with head and neck cancer: emphasizing the role of calcium alginate dressings. *Support Care Cancer.* 2019;27(8):2957-2967. doi:10.1007/s00520-018-4606-2
35. Mak S, Zee C, Molassiotis A, et al. A Comparison of Wound Treatments in Nasopharyngeal Cancer Patients Receiving Radiation Therapy: *Cancer Nurs.* 2005;28(6):436-545. doi:10.1097/00002820-200511000-00005
